# Supplementary material
Source: publisher site journal article supplement (https://www.dovepress.com/article/421054)
Supplement: Supplementary file 1 [file get_supplementary_file.php]

**Appendix 1. Checklist for Reporting Results of Internet E-Surveys (CHERRIES)**

| ***Checklist Item*** | ***Explanation*** | ***Page Number*** |
| --- | --- | --- |
| Describe survey design | Describe target population, sample frame. Is the sample a convenience sample? (In “open” surveys this is most likely.) | 5 |
| IRB approval | Mention whether the study has been approved by an IRB. | 5 |
| Informed consent | Describe the informed consent process. Where were the participants told the length of time of the survey, which data were stored and where and for how long, who the investigator was, and the purpose of the study? | 5-6 |
| Data protection | If any personal information was collected or stored, describe what mechanisms were used to protect unauthorized access. | 5 |
| Development and testing | State how the survey was developed, including whether the usability and technical functionality of the electronic questionnaire had been tested before fielding the questionnaire. | 5 |
| Open survey versus closed survey | An “open survey” is a survey open for each visitor of a site, while a closed survey is only open to a sample which the investigator knows (password-protected survey). | 5 |
| Contact mode | Indicate whether or not the initial contact with the potential participants was made on the Internet. (Investigators may also send out questionnaires by mail and allow for Web-based data entry.) | 5 |
| Advertising the survey | How/where was the survey announced or advertised? Some examples are offline media (newspapers), or online (mailing lists – If yes, which ones?) or banner ads (Where were these banner ads posted and what did they look like?). It is important to know the wording of the announcement as it will heavily influence who chooses to participate. Ideally the survey announcement should be published as an appendix. | 5 |
| Web/E-mail | State the type of e-survey (eg, one posted on a Web site, or one sent out through e-mail). If it is an e-mail survey, were the responses entered manually into a database, or was there an automatic method for capturing responses? | 5 |
| Context | Describe the Web site (for mailing list/newsgroup) in which the survey was posted. What is the Web site about, who is visiting it, what are visitors normally looking for? Discuss to what degree the content of the Web site could pre-select the sample or influence the results. For example, a survey about vaccination on a anti-immunization Web site will have different results from a Web survey conducted on a government Web site | 5 |
| Mandatory/voluntary | Was it a mandatory survey to be filled in by every visitor who wanted to enter the Web site, or was it a voluntary survey? | 5 |
| Incentives | Were any incentives offered (eg, monetary, prizes, or non-monetary incentives such as an offer to provide the survey results)? | 5 |
| Time/Date | In what timeframe were the data collected? | 5-6 |
| Randomization of items or questionnaires | To prevent biases items can be randomized or alternated. | 5-6 |
| Adaptive questioning | Use adaptive questioning (certain items, or only conditionally displayed based on responses to other items) to reduce number and complexity of the questions. | 5-6 |
| Number of Items | What was the number of questionnaire items per page? The number of items is an important factor for the completion rate. | 5-6 |
| Number of screens (pages) | Over how many pages was the questionnaire distributed? The number of items is an important factor for the completion rate. | 5-6 |
| Completeness check | It is technically possible to do consistency or completeness checks before the questionnaire is submitted. Was this done, and if “yes”, how (usually JAVAScript)? An alternative is to check for completeness after the questionnaire has been submitted (and highlight mandatory items). If this has been done, it should be reported. All items should provide a non-response option such as “not applicable” or “rather not say”, and selection of one response option should be enforced. | 5-6 |
| Review step | State whether respondents were able to review and change their answers (eg, through a Back button or a Review step which displays a summary of the responses and asks the respondents if they are correct). | 5-6 |
| Unique site visitor | If you provide view rates or participation rates, you need to define how you determined a unique visitor. There are different techniques available, based on IP addresses or cookies or both. | Not applicable |
| View rate (Ratio of unique survey visitors/unique site visitors) | Requires counting unique visitors to the first page of the survey, divided by the number of unique site visitors (not page views!). It is not unusual to have view rates of less than 0.1 % if the survey is voluntary. | Not applicable |
| Participation rate (Ratio of unique visitors who agreed to participate/unique first survey page visitors) | Count the unique number of people who filled in the first survey page (or agreed to participate, for example by checking a checkbox), divided by visitors who visit the first page of the survey (or the informed consents page, if present). This can also be called “recruitment” rate. | 6-7 |
| Completion rate (Ratio of users who finished the survey/users who agreed to participate) | The number of people submitting the last questionnaire page, divided by the number of people who agreed to participate (or submitted the first survey page). This is only relevant if there is a separate “informed consent” page or if the survey goes over several pages. This is a measure for attrition. Note that “completion” can involve leaving questionnaire items blank. This is not a measure for how completely questionnaires were filled in. (If you need a measure for this, use the word “completeness rate”.) | 6-7 |
| Cookies used | Indicate whether cookies were used to assign a unique user identifier to each client computer. If so, mention the page on which the cookie was set and read, and how long the cookie was valid. Were duplicate entries avoided by preventing users access to the survey twice; or were duplicate database entries having the same user ID eliminated before analysis? In the latter case, which entries were kept for analysis (eg, the first entry or the most recent)? | Not applicable |
| IP check | Indicate whether the IP address of the client computer was used to identify potential duplicate entries from the same user. If so, mention the period of time for which no two entries from the same IP address were allowed (eg, 24 hours). Were duplicate entries avoided by preventing users with the same IP address access to the survey twice; or were duplicate database entries having the same IP address within a given period of time eliminated before analysis? If the latter, which entries were kept for analysis (eg, the first entry or the most recent)? | Not applicable |
| Log file analysis | Indicate whether other techniques to analyze the log file for identification of multiple entries were used. If so, please describe. | Not applicable |
| Registration | In “closed” (non-open) surveys, users need to login first and it is easier to prevent duplicate entries from the same user. Describe how this was done. For example, was the survey never displayed a second time once the user had filled it in, or was the username stored together with the survey results and later eliminated? If the latter, which entries were kept for analysis (eg, the first entry or the most recent)? | 5-6 |
| Handling of incomplete questionnaires | Were only completed questionnaires analyzed? Were questionnaires which terminated early (where, for example, users did not go through all questionnaire pages) also analyzed? | 5-6 |
| Questionnaires submitted with an atypical timestamp | Some investigators may measure the time people needed to fill in a questionnaire and exclude questionnaires that were submitted too soon. Specify the timeframe that was used as a cut-off point, and describe how this point was determined. | 5-6 |
| Statistical correction | Indicate whether any methods such as weighting of items or propensity scores have been used to adjust for the non-representative sample; if so, please describe the methods. | 6-7 |

This checklist has been modified from Eysenbach G. Improving the quality of Web surveys: the Checklist for Reporting Results of Internet E-Surveys (CHERRIES). J Med Internet Res. 2004 Sep 29;6(3):e34 [erratum in J Med Internet Res. 2012; 14(1): e8.]. Article available at [https://www.jmir.org/2004/3/e34](https://www.jmir.org/2004/3/e34/)/; erratum available <https://www.jmir.org/2012/1/e8/>. Copyright ©Gunther Eysenbach. Originally published in the [Journal of Medical Internet](http://www.jmir.org) Research, 29.9.2004 and 04.01.2012.

This is an open-access article distributed under the terms of the Creative Commons Attribution License (<https://creativecommons.org/licenses/by/2.0/>), which permits unrestricted use, distribution, and reproduction in any medium, provided the original work, first published in the Journal of Medical Internet Research, is properly cited.

**Appendix 2. Preferred Practice Patterns of Congenital Nasolacrimal Duct Obstruction Questionnaire**

- **Demographic data**

1. **Age** (in years):

2. **Gender**:

- Male
- Female

3. **How many years have you been in practice (after passing the BOARD)**

- < 5 years
- 5-10 years
- 11-20 years
- > 20 years

4. **What is your specialty?** (You may choose more than one option)

- General ophthalmologist
- Pediatric ophthalmologist
- Oculoplastic ophthalmologist
- Others (please specify)

*Others include retina, cornea, glaucoma, neuro-ophthalmology specialists

5. **Type of practice?** (You may choose more than one option)

- Ministry of Health
- University hospitals
- Private practice
- Military hospitals
- **Preferred practice patterns of CNLDO**

1. **In the first visit for the patient with suspected CNLDO; how do you reach the diagnosis?** (You may choose more than one option)

- Examine both lacrimal puncti
- Check for dye disappearance test
- Check for lacrimal reflux
- Estimate lacrimal lake
- Other (please specify)

2. **Do you instruct parents to massage the nasolacrimal duct of a child with CNLDO?**

- Yes
- No

3. **Up to what age do you prescribe Criggler's sac compression/massage in children with CNLDO?**

- 3 months
- 6 months
- 9 months
- 12 months
- 15 months
- 18 months

4. **How long do you prefer medical management before considering surgical management or referral?**

- 3 months
- 6 months
- 9 months
- 12 months
- 15 months
- 18 months

5. **Do you perform surgery for CNLDO?**

- Yes
- No

6. **Do you perform probing in the office for infants with CNLDO?**

- Yes
- No
- Only for unilateral cases

7. **What is the maximum age you perform probing in the office?**

- I never perform this procedure in the office
- 3 months
- 6 months
- 9 months
- 12 months

8. **Do you perform infracture of inferior turbinate?**

- Yes
- No

9. **For infracture of inferior turbinate, when do you consider it?** (You may choose more than one option)

- I never perform infracture of inferior turbinate
- All cases with primary probing
- Only for repeat probing or failed cases
- Only for cases where I feel resistance/tightness at the inferior meatus
- Other (please specify)

10. **What is your preferred type of silicone intubations?**

- I never perform silicone intubations
- Monocanalicular
- Bicanalicular

11. **When do you consider monocanalicular or bicanalicular stenting?** (You may choose more than one option)

- I never perform silicone intubations
- All cases with primary probing
- For children ≥ 12 months
- Only for repeat probing or failed cases regardless of age
- Other (please specify)

12. **For silicone intubation, where do you usually retrieve the tube?**

- I never perform bicanalicular intubations
- In the office
- In the operating room (under general anesthesia)

13. **How long do you usually keep the silicone tube in place?**

- I never perform silicone intubations
- 1 month
- 2 months
- 3-4 months
- 5-6 months
- Other (please specify)

14. **Do you consider balloon catheterization for CNLDO?**

- Yes
- No

15. **For balloon catheterization, when would you consider it for CNLDO?**

- As a primary procedure in children with CNLDO
- For who failed lacrimal probing
- For who failed silicone intubations
- For who with intermittent obstruction (suggestive of partial obstruction or narrow duct)
- Other (please specify)

16. **Do you perform DCR for CNLDO?**

- Yes
- No

17. **In your practice, which of the following do you perform most frequently for primary nasolacrimal duct obstruction?**

- External DCR
- Endoscopic Endonasal DCR
- Non-endoscopic Endonasal DCR
- Laser DCR

18. **What is your preferred practice for 12 months old child presenting with failed probing or recurrent obstruction?**

- Probing with silicone stenting
- Probing with infracture of inferior turbinate and stenting
- Probing with ballon catheterization
- DCR
- Referral to oculoplastic or pediatric ophthalmologists

19. **What is your preferred practice for 18 months old child presenting with failed probing or recurrent obstruction?**

- Probing with silicone stenting
- Probing with infracture of inferior turbinate and stenting
- Probing with ballon catheterization
- DCR
- Referral to oculoplastic or pediatric ophthalmologists

20. **What is your preferred practice for 24 months old child presenting with failed probing or recurrent obstruction?**

- Probing with silicone stenting
- Probing with infracture of inferior turbinate and stenting
- Probing with ballon catheterization
- DCR
- Referral to oculoplastic or pediatric ophthalmologists

21. **What is your preferred practice for 36 months old child presenting with failed probing or recurrent obstruction?**

- Probing with silicone stenting
- Probing with infracture of inferior turbinate and stenting
- Probing with ballon catheterization
- DCR
- Referral to oculoplastic or pediatric ophthalmologists

22. **Do you think it is necessary to check refraction of an infant with CNLDO on initial visit or soon thereafter?**

- Yes
- No

23. **What type of refractive errors are associated CNLDO?** (You may choose more than one option)

- Myopia
- Hypermetropia
- Astigmatism
- Ambloypia

24. **Do you regularly follow children with CNLDO for development of amblyopia?**

- Yes
- No

25. **Do you regularly follow children with CNLDO for development of congenital glaucoma?**

- Yes
- No
- Sometimes according to the clinical picture

26. **For a child presenting with epiphora, what would you do to rule out congenital glaucoma?** (You may choose more than one option)

- Check IOP
- Looking at cornea for haziness or enlarged diameter
- Looking at optic nerve through undilated exam
- Dilated exam whenever possible with optic nerve evaluation
